# Supplementary material
Source: PubMed Central journal article supplement (PMC3951648)
Supplement: NIHMS553882-supplement-01.pdf [file NIHMS553882-supplement-01.pdf]

## **Supplementary Information**

for

### **Crystal Structure of the F27G AIM2 PYD Mutant and Similarities of its Self-association to DED/DED Interactions**

Alvin Lu, Venkataraman Kabaleeswaran, Tianmin Fu, Venkat Giri Magupalli and Hao Wu\*

Department of Biological Chemistry and Molecular Pharmacology, Harvard Medical School,  
Program in Cellular and Molecular Medicine, Boston Children's Hospital, Boston, MA 02115

\*Correspondence to

Hao Wu, Ph.D.

[Hao.wu@childrens.harvard.edu](mailto:Hao.wu@childrens.harvard.edu)

1-617-713-8160 (Phone)

1-617-713-8161 (Fax)

This document contains the following supplementary information:

Supplementary Table 1

Supplementary Table 2

Supplementary References

### Supplementary Table 1. Crystallographic statistics

| Diffraction data                                    |                                               |
|-----------------------------------------------------|-----------------------------------------------|
| Space group                                         | P2 <sub>1</sub> 2 <sub>1</sub> 2 <sub>1</sub> |
| Cell dimensions                                     |                                               |
| <i>a</i> , <i>b</i> , <i>c</i> (Å)                  | 29.94, 37.95, 76.95                           |
| Resolution (Å)                                      | 38 - 1.82                                     |
| <i>R</i> <sub>sym</sub> *                           | 0.057 (0.679)                                 |
| <i>I</i> / $\sigma$ <sub><i>I</i></sub> *           | 24.9 (7.4)                                    |
| Completeness (%) *                                  | 90.6 (50.81)                                  |
| Redundancy *                                        | 10.6 (9.2)                                    |
| Refinement                                          |                                               |
| Resolution (Å)                                      | 38 - 1.82                                     |
| No. reflections                                     | 7,497                                         |
| <i>R</i> <sub>work</sub> / <i>R</i> <sub>free</sub> | 0.18 / 0.24                                   |
| No. atoms                                           | 829                                           |
| Protein                                             | 738                                           |
| Water                                               | 91                                            |
| Average B factor (Å <sup>2</sup> )                  | 19.6                                          |
| Protein (Å <sup>2</sup> )                           | 18.7                                          |
| Water (Å <sup>2</sup> )                             | 26.8                                          |
| R.M.S. Deviations                                   |                                               |
| Bond lengths (Å) / angles (°)                       | 0.006 / 0.84                                  |
| Ramachandran plot                                   |                                               |
| Favored (%)                                         | 99                                            |
| Allowed (%)                                         | 1                                             |

For crystallization, the SUMO-AIM2<sup>PYD</sup> F27G fusion protein was incubated overnight with Ulp1 at a molar ratio of 1/1000 of the fusion protein while dialyzing against the gel filtration buffer at 4°C. The free His-SUMO was removed by another incubating the sample with Ni-NTA resin. The flow-through was collected and concentrated to load on a Superdex200 10/300 GL column. Fractions corresponding to the cleaved AIM2<sup>PYD</sup> F27G were pooled and concentrated to 18mg/mL for crystallization. AIM2<sup>PYD</sup> F27G was crystallized by hanging-drop vapor diffusion in a 48-well VDX tray (Hampton) at 16°C by mixing equal volumes of the protein sample and a mother liquor containing 0.2 M CaCl<sub>2</sub>, 0.1 M Sodium Acetate at pH 4.7, and 23 % PEG3350. During optimization, trypsin was added to a mass ratio of 1/50 of AIM2<sup>PYD</sup> F27G for *in situ* proteolysis. The best diffracting crystals were shaped like rigid, single needles with a long dimension of > 150 μm and short dimensions of < 5 μm. X-ray diffraction data were collected at the NSLS X29 beamline of Brookhaven National Laboratory and processed with the HKL2000 program suite <sup>1</sup>. Because of the low sequence identity of AIM2<sup>PYD</sup> to any known PYD structures, we generated a structural composite by superimposing PDB models of NLRP10 (2DO9), ASC (1UCP), NLRP7 (2KM6), NLRP3 (3QF2) and NLRP1 (1PN5), and selecting common secondary structural elements with high sequence similarity and low root-mean-square deviations. We trimmed the composite to a poly-Ala model and searched for the molecular replacement solution in the program MOLREP <sup>2</sup>. Model building and refinement at 1.87 Å was carried out using Coot <sup>3</sup> and PHENIX <sup>4</sup>

\*Values in parentheses are for the highest-resolution shell.

**Supplementary Table 2.** Top 20 hits from structural homology search using DALI <sup>5</sup>

| DALI Hits | Protein domains  | PDB IDs | Z-scores |
|-----------|------------------|---------|----------|
| 1         | MBP-hAIM2 PYD    | 3VD8    | 17.8     |
| 2         | hASC PYD         | 1UCP    | 13.5     |
| 3         | hNLRP3 PYD       | 3QF2    | 13.5     |
| 4         | hASC2 PYD        | 2HM2    | 13.2     |
| 5         | hASC PYD         | 2KN6    | 12.8     |
| 6         | hNLRP4 PYD       | 4EWI    | 11.9     |
| 7         | hMNDA PYD        | 2DBQ    | 11.8     |
| 8         | hNLRP7 PYD       | 2KM6    | 11.8     |
| 9         | vFLIP MC159 DED2 | 2F1S    | 11.3     |
| 10        | mNLRP10 PYD      | 2DO9    | 11.2     |
| 11        | hNLRP12 PYD      | 2L6A    | 10.8     |
| 12        | mPEA15 DED       | 2LS7    | 10.8     |
| 13        | chPEA-15 DED     | 4IZ7    | 10.6     |
| 14        | vFLIP MC159 DED2 | 2BBZ    | 10.3     |
| 15        | hFADD DD         | 3EZQ    | 10.1     |
| 16        | mP205 PYD        | 2YU0    | 9.2      |
| 17        | cCED4 CARD       | 3LQQ    | 9.0      |
| 18        | cCED9 CARD       | 2A5V    | 8.9      |
| 19        | hApaf-1 CARD     | 3YGS    | 8.5      |
| 20        | hTNFR1 DD        | 1ICH    | 8.5      |

h: human; m: mouse; c: *C. elegans*; ch: Chinese hamster; v: viral

### Supplementary References

1. Otwinowski, Z. & Minor, W. (1997). Processing of X-ray diffraction data collected in oscillation mode. *Methods Enzymol.* **276**, 307-326.
2. Vagin, A. A. & Teplyakov, A. (1997). MOLREP: an Automated Program for Molecular Replacement. *J. Appl. Cryst.* **30**, 1022.
3. Emsley, P. & Cowtan, K. (2004). Coot: model-building tools for molecular graphics. *Acta Crystallogr D Biol Crystallogr* **60**, 2126-32.
4. Adams, P. D., Afonine, P. V., Bunkoczi, G., Chen, V. B., Davis, I. W., Echols, N., Headd, J. J., Hung, L. W., Kapral, G. J., Grosse-Kunstleve, R. W., McCoy, A. J., Moriarty, N. W., Oeffner, R., Read, R. J., Richardson, D. C., Richardson, J. S., Terwilliger, T. C. & Zwart, P. H. (2010). PHENIX: a comprehensive Python-based system for macromolecular structure solution. *Acta Crystallogr D Biol Crystallogr* **66**, 213-21.
5. Holm, L. & Sander, C. (1995). Dali: a network tool for protein structure comparison. *Trends Biochem. Sci.* **20**, 478-480.
